# Supplementary material
Source: MDPI journal article supplement (https://www.mdpi.com/2073-4395/11/11/2160)
Supplement: s1 [file s1]

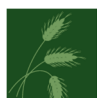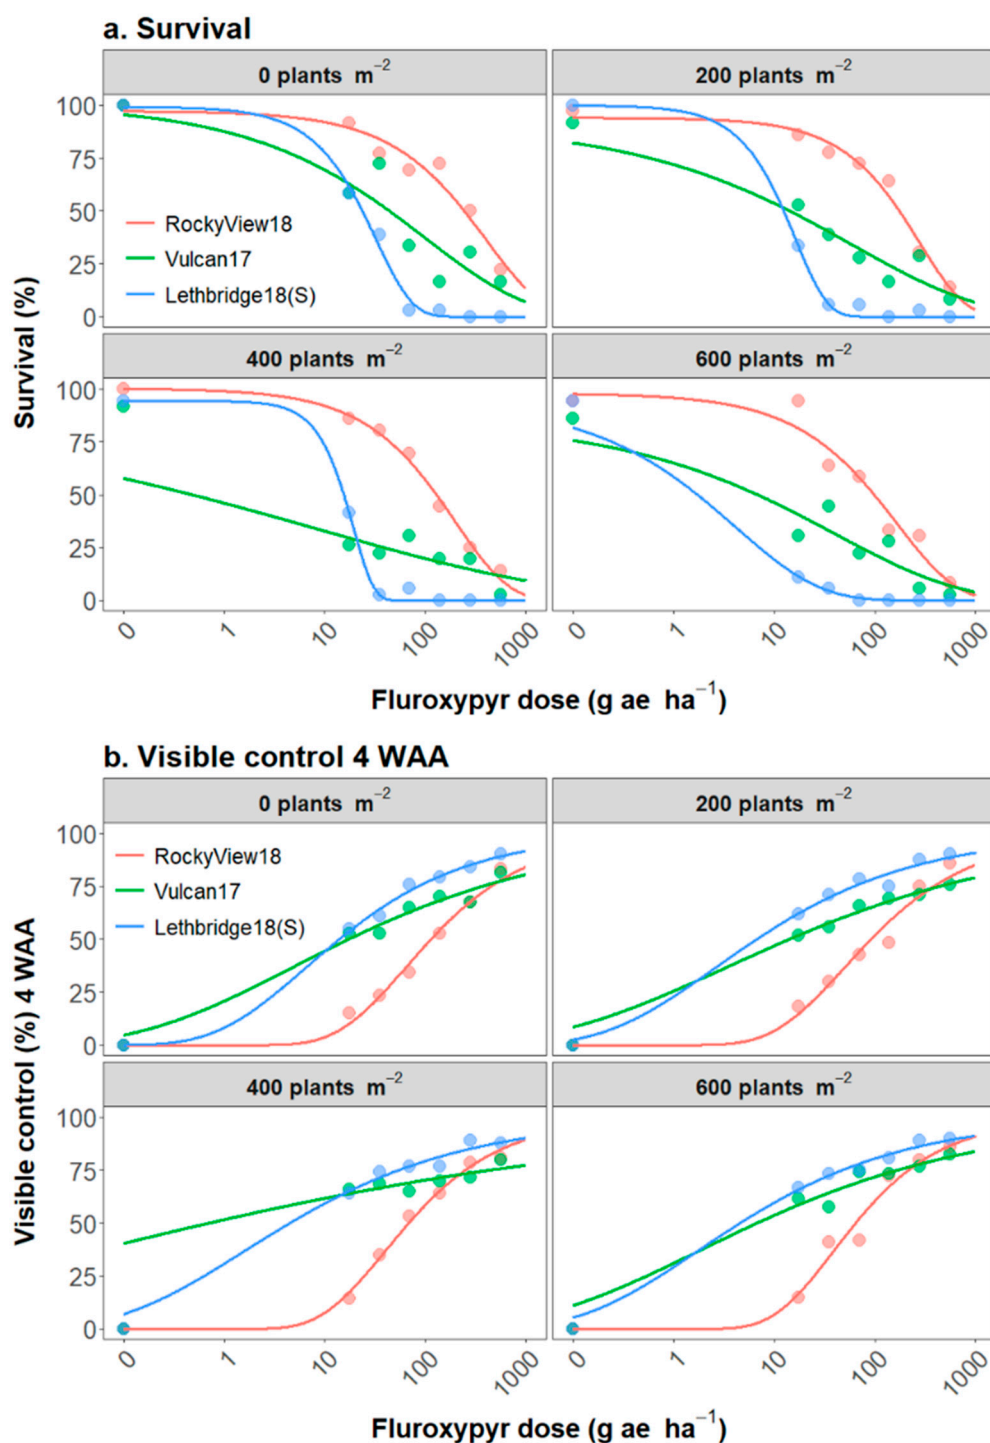

**Figure S1.** Plant survival (a) and visible control 4 weeks after application (WAA) (b) for three kochia populations [RockyView18, Vulcan17, and Lethbridge18(S)] in response to fluroxypyr rate in four wheat plant density treatments (0, 200, 400, and 600 plants  $m^{-2}$ ). Wheat plant densities are displayed separately within each subfigure. Dots indicate means, while lines indicate the predicted values from the fitted three-parameter, and two-parameter Weibull type 1 models, respectively.

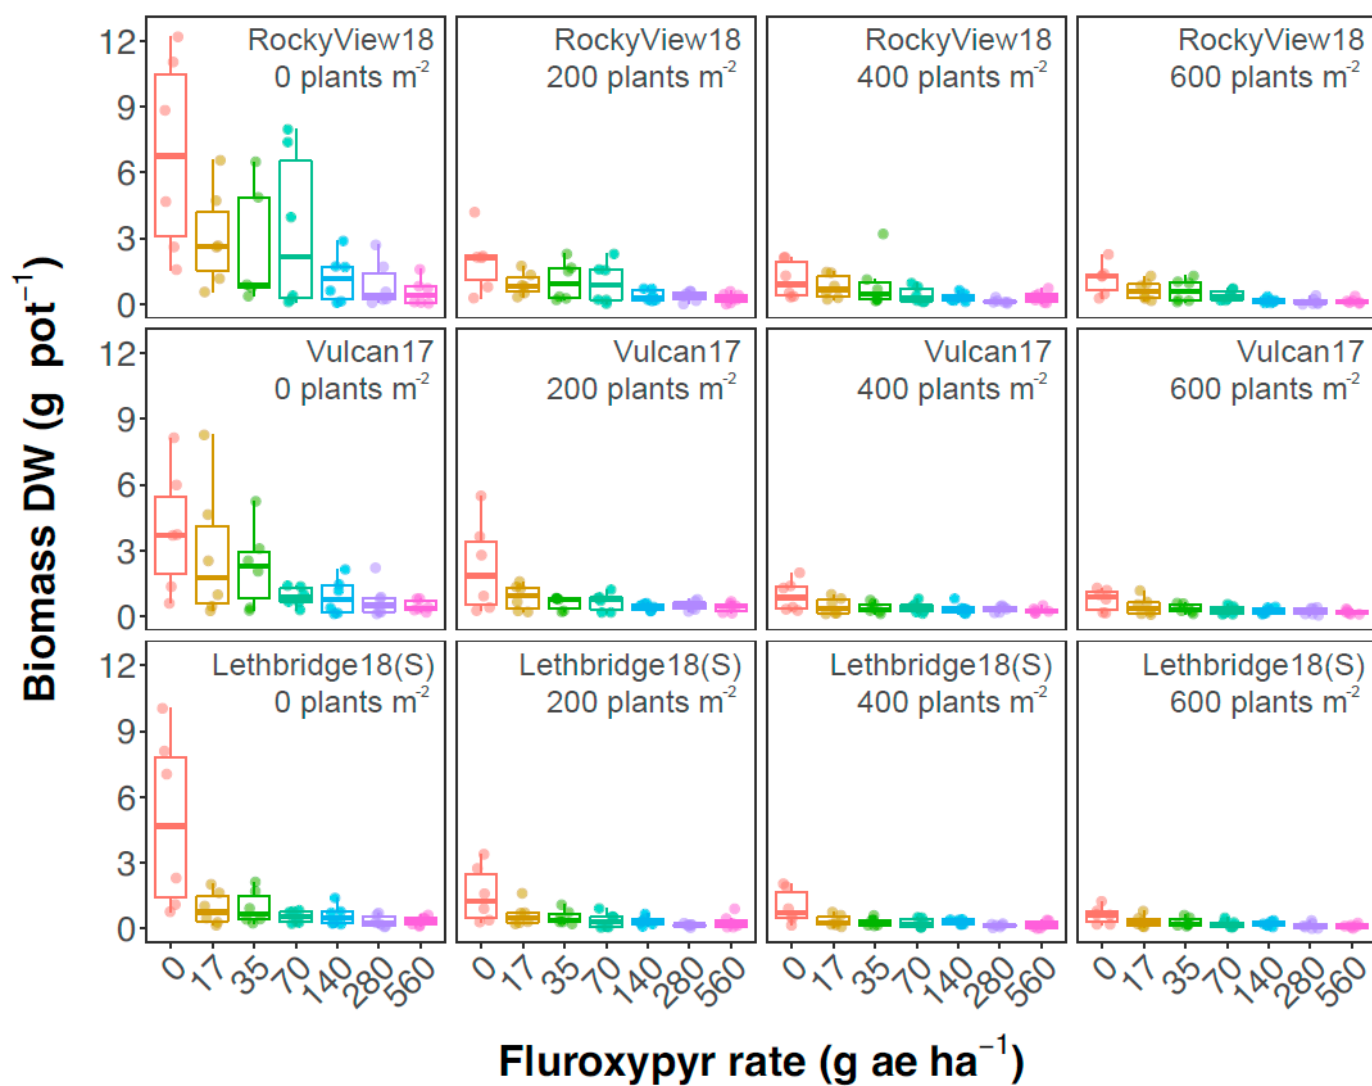

Figure S2
